# Supplementary material for: Genome–Transcriptome Transition Approaches to Characterize Anthocyanin Biosynthesis Pathway Genes in Blue, Black and Purple Wheat
Source: MDPI journal article supplement (doi:10.3390/genes14040809), 2023-03-27
Supplement: s1 [file s1]

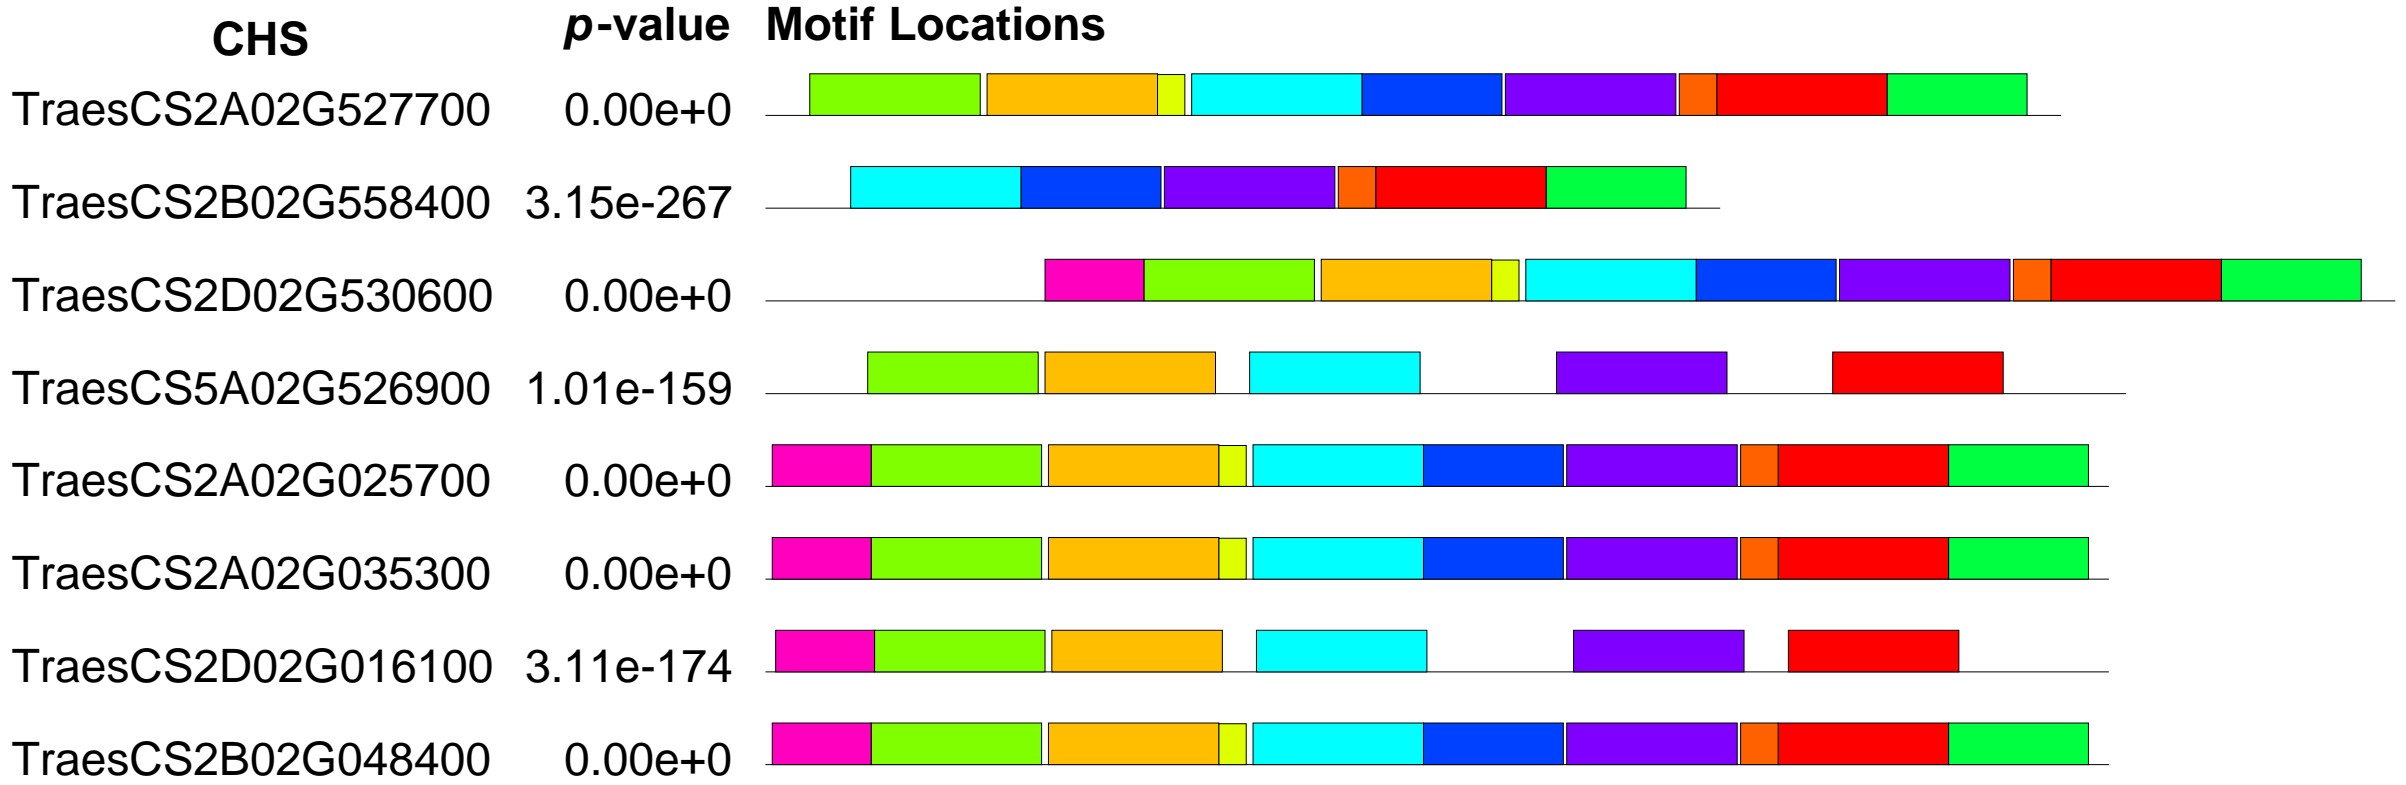

| Motif | Symbol                                                                              | Motif Consensus                                    |
|-------|-------------------------------------------------------------------------------------|----------------------------------------------------|
| 1.    |    | WNSVFWIAHPGGPAILDMVEAKVNLNKERMTRATHVLSEYGNMSSACVLF |
| 2.    |    | DYQLTKMLGLRPSVKRLMMYQQGCFAGGTVLRLAKDLAENNRGARVLVVC |
| 3.    |    | NCVYQADYPDYYFKITKSDHMADLKEKFKRMCDKSQIRKRYMHLTEEILQ |
| 4.    |   | ERPLFQLVSASQTILPDSEGAIDGHLREVGLTFHLLKDVPGLISKNIERA |
| 5.    |  | PNMCAYMAPSLDARQDIVVVEVPKLGKAAAQKAKEWGQPRSKITHLVFC  |
| 6.    |  | IMDEMRKRSAEDGHATTGEGMDWGVLFGFPGPLTVETVVLH          |
| 7.    |  | SEITAVTFRGPHESHLDLVLGQALFGDGAAAVIIGADPDES          |
| 8.    |  | ATMTVEEVKRAQRAEGPATVLAIGTATPA                      |
| 9.    |  | EDAFKPLGIDD                                        |
| 10.   |  | TTSGVDMP                                           |

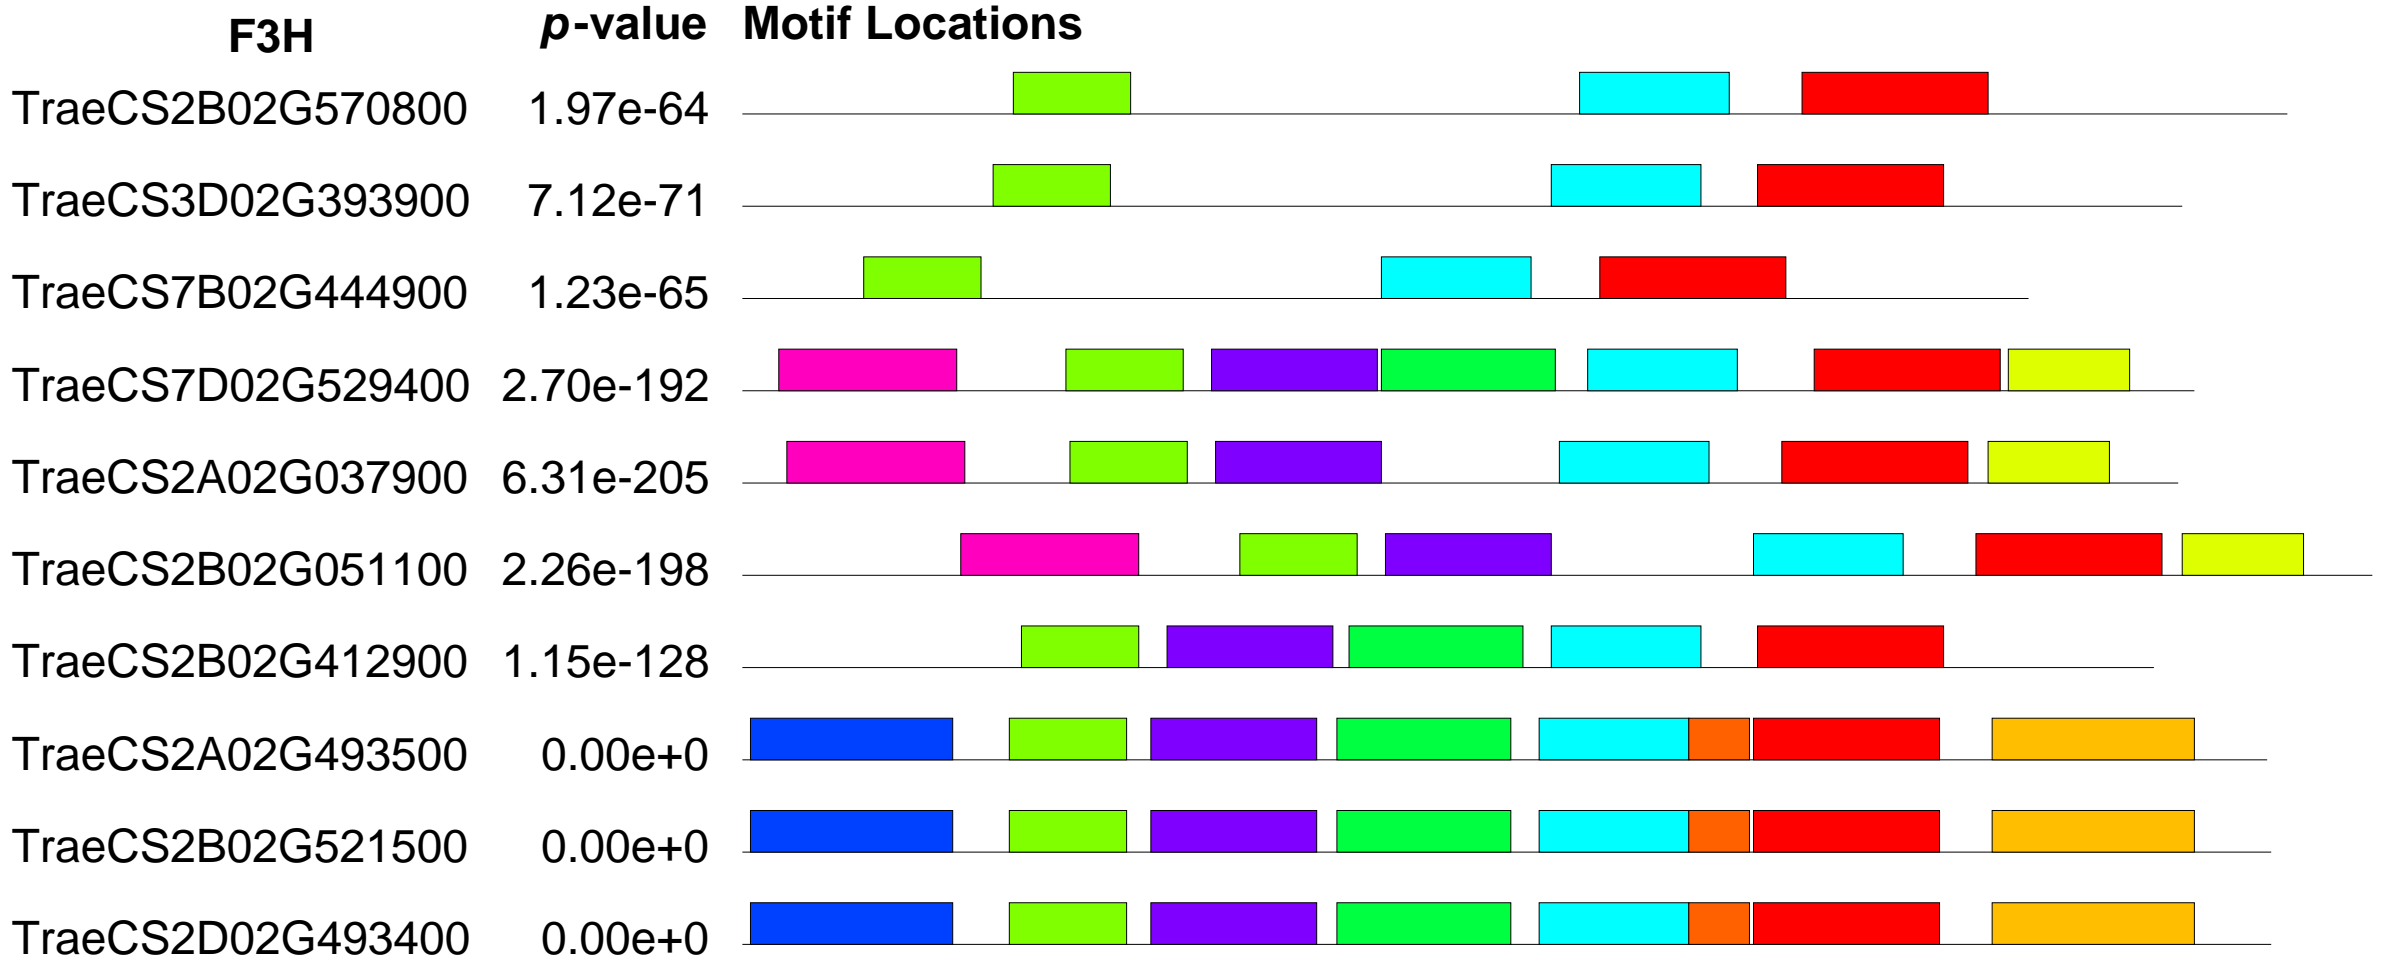

| Motif | Symbol | Motif Consensus                                     |
|-------|--------|-----------------------------------------------------|
| 1.    |        | PPVSGALVVNIGDHLQLMSNGRFKSVEHRAVVNGEGPRLSVATFFN      |
| 2.    |        | QKVAVNYYPACPZPDLTLGLKRHTDPGFJTLLLQDAV               |
| 3.    |        | CETWGFFQVVNHGVPEALIADMLRAVREF                       |
| 4.    |        | KKPYDRDGGKKGRYISSSDLQGEAVABWRDILTYSYPVP             |
| 5.    |        | EGEEPILEEPITFAEMYRRKMERDLDLAKRKKQAKDQLMQQQQLQLQQQQQ |
| 6.    |        | RWPEKPAGWRAVVERYSERLMGLSCKLLGVLSEAMGLESEALA         |
| 7.    |        | PVSNETFLPTAAWGEATLRPSFVRDEDERPKVAHDRFSDAVPVISLDGID  |
| 8.    |        | LKAFDETRAGVKGLVDAGVTAVPSIFHHPPESLDHGASRPHRFT        |
| 9.    |        | GGLQATRDGGKTWIT                                     |
| 10.   |        | APTRVLAPIVADGDEARYRSTTVEEVVRQY                      |

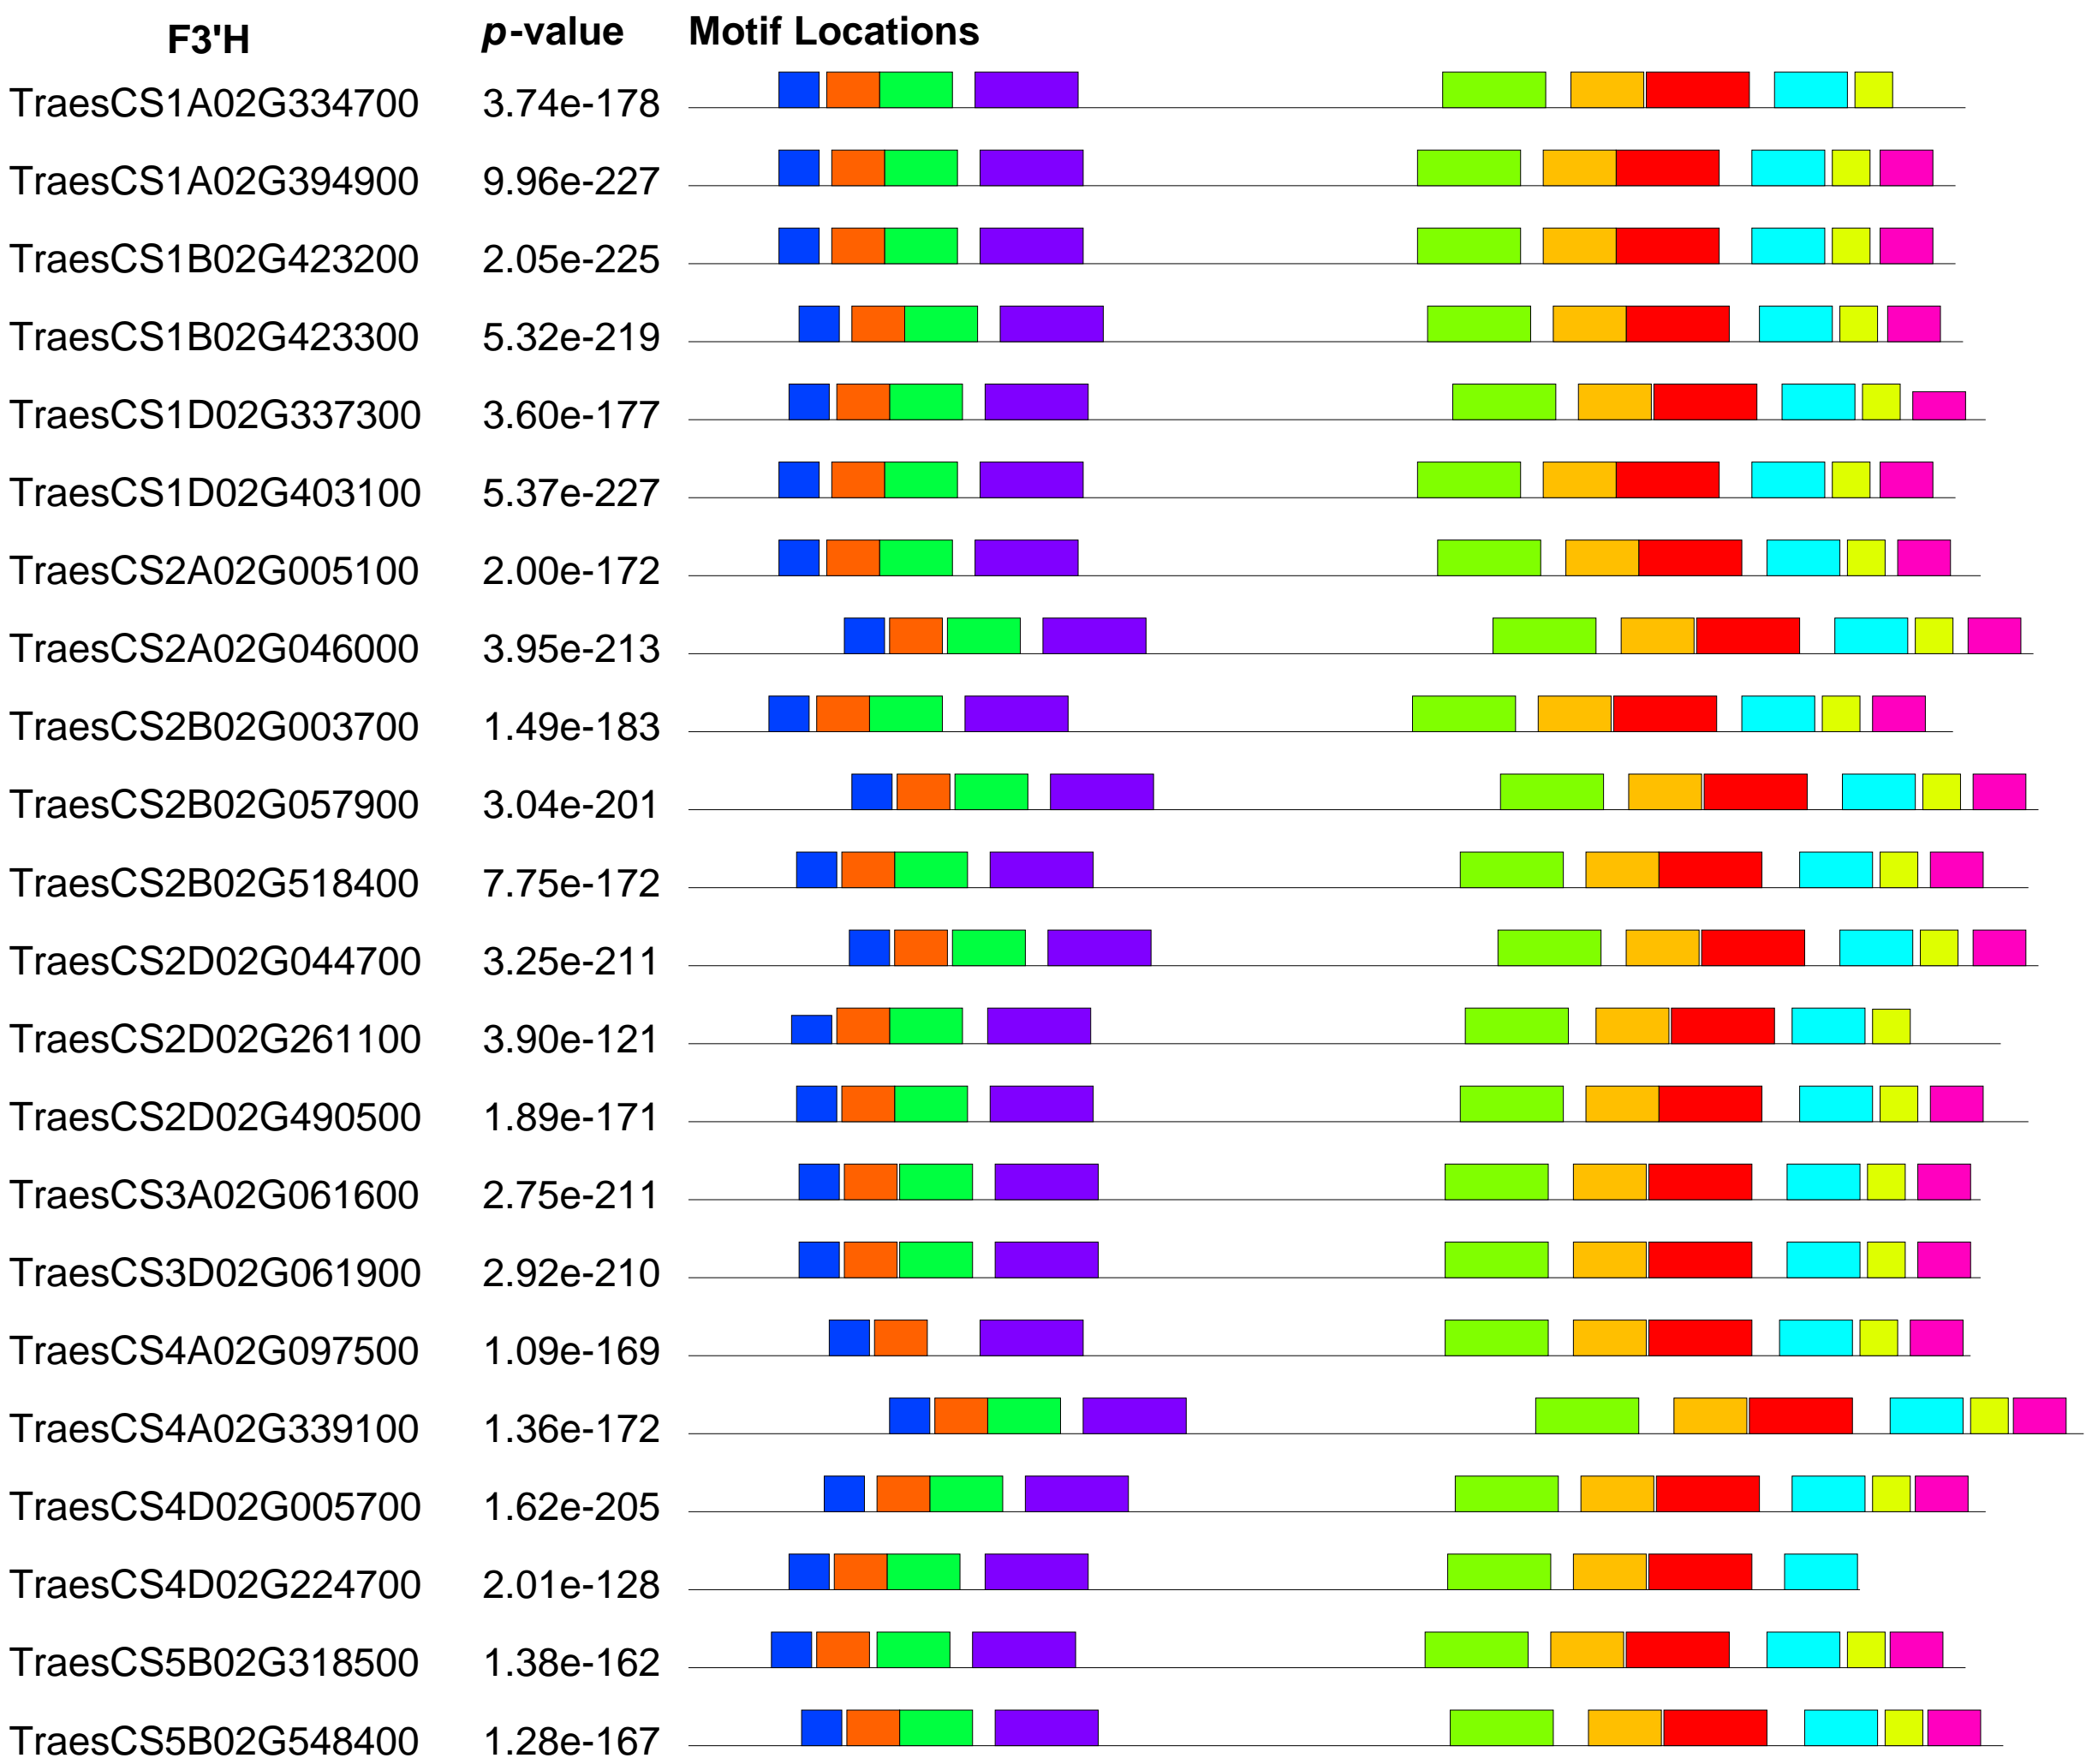

| Motif | Symbol | Motif Consensus                            |
|-------|--------|--------------------------------------------|
| 1.    |        | PRESQEDCQVQGYDVPAGTRVLVNAWAIGRDPAYWEDAEEF  |
| 2.    |        | DFKGNDFZFLPFGAGRRCPGMAFGLASV               |
| 3.    |        | IKAVJLDVFAAGTDTSATTTJEWAMAELMRNPRVMQKAQAEV |
| 4.    |        | YGGSDIAFAPYGEYWRQLRKJAVVELLSARRVRSFRAIR    |
| 5.    |        | VAEDDLAKLPYLKAVIKETLRLHPPAPLL              |
| 6.    |        | GAVPTVVVSSAEAAREVLKTHDHVFASRP              |
| 7.    |        | PPGPWALPIIGHLHLL                           |
| 8.    |        | JDMTEAFGLTVRRKEPLLLVP                      |
| 9.    |        | LPHRALRDLARRHGPLMLLRL                      |
| 10.   |        | LANLLYHFDWELPDG                            |

F3'5'H

*p*-value

Motif Locations

TraesCS1D02G403300

6.50e-153

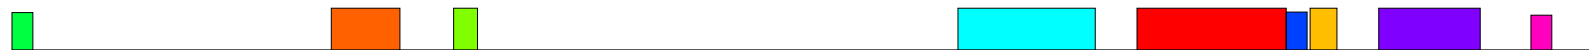

TraesCS2D02G521700

1.77e-132

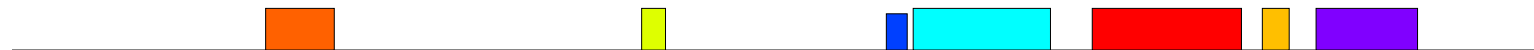

TraesCS5A02G270700

3.32e-146

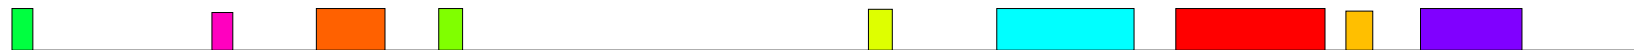

| Motif | Symbol                                                                            | Motif Consensus                                    |
|-------|-----------------------------------------------------------------------------------|----------------------------------------------------|
| 1.    |  | YLQAVIRETLRLHPYGPLJPPREAMEDCTVAGYDVPRGTQVIVNVWALGR |
| 2.    |  | IKAIVLDILIAGTDTTSATTVEWAMAELMNNPEVMRKATAELDAVVG    |
| 3.    |  | PYGDQWRK                                           |
| 4.    |  | FLPFGAGRRGCPGIALGLRFVGLALASLLQGFDW                 |
| 5.    |  | PEEFRPERF                                          |
| 6.    |  | MEKCRSN                                            |
| 7.    |  | DPEYWPD                                            |
| 8.    |  | HQRLKNK                                            |
| 9.    |  | VVSSRAAAREVLRKHDAAFAGRP                            |
| 10.   |  | IZERIEEW                                           |

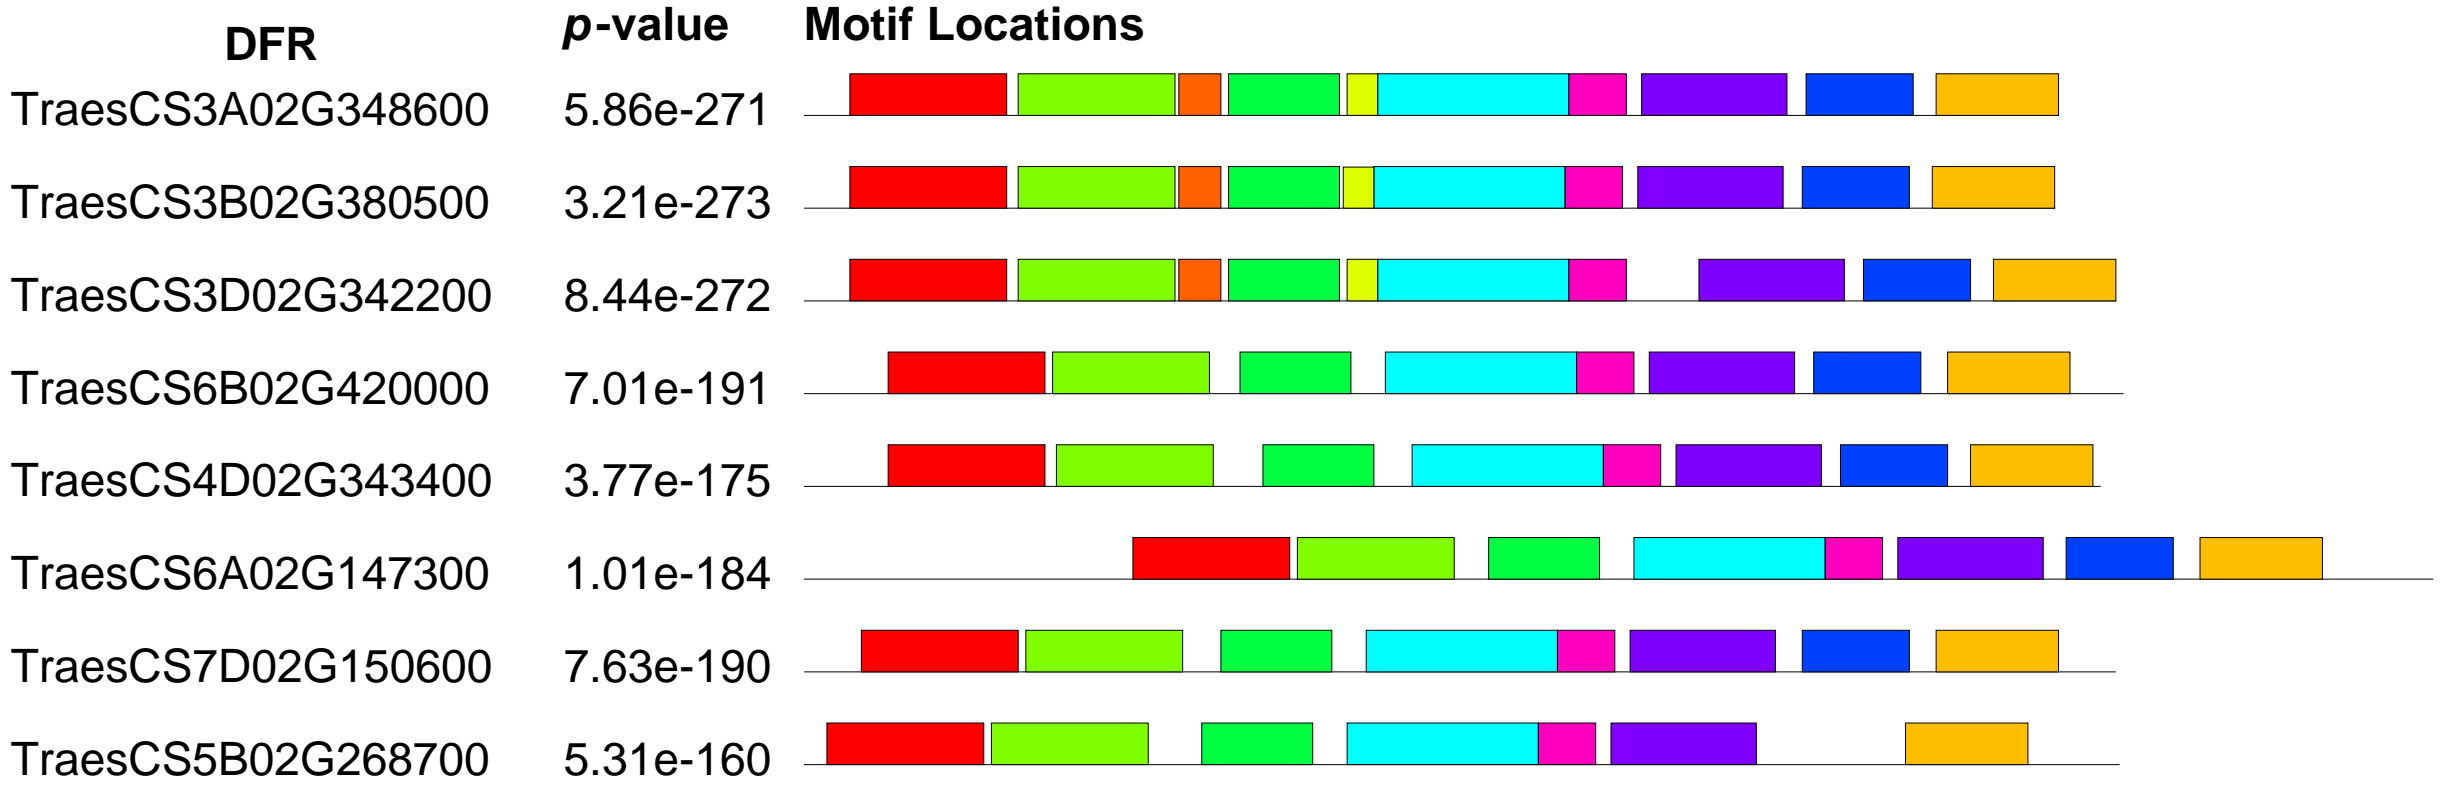

| Motif | Symbol | Motif Consensus                                   |
|-------|--------|---------------------------------------------------|
| 1.    |        | VCVTGGGGFIGSWJVKLLLDRGYTVHGTVRNPQDEKNAHLL         |
| 2.    |        | DESCWSDVEICKKTELWYCVSKTLAEKAAWEFAGEEGLELVVNPGLVLG |
| 3.    |        | DGADERLRLRFQADLLDPASLRAAIEGCHGVFHLASPVILDP        |
| 4.    |        | GQKLTYENFFVGYVDVRDVAQALVLVYENPSAQGRYLC            |
| 5.    |        | SSKKLRDLGVRFTPLDETLRETVDCLREKGEJ                  |
| 6.    |        | GTLNVLRAAKDAGVKRVVMTSSQTAVCPN                     |
| 7.    |        | HLVDFHDI LANLYPEYPIPRIQEDEQGW                     |
| 8.    |        | PTLQPAPNGSLRLLL                                   |
| 9.    |        | QDPENELLPA                                        |
| 10.   |        | DWPAGKVI                                          |

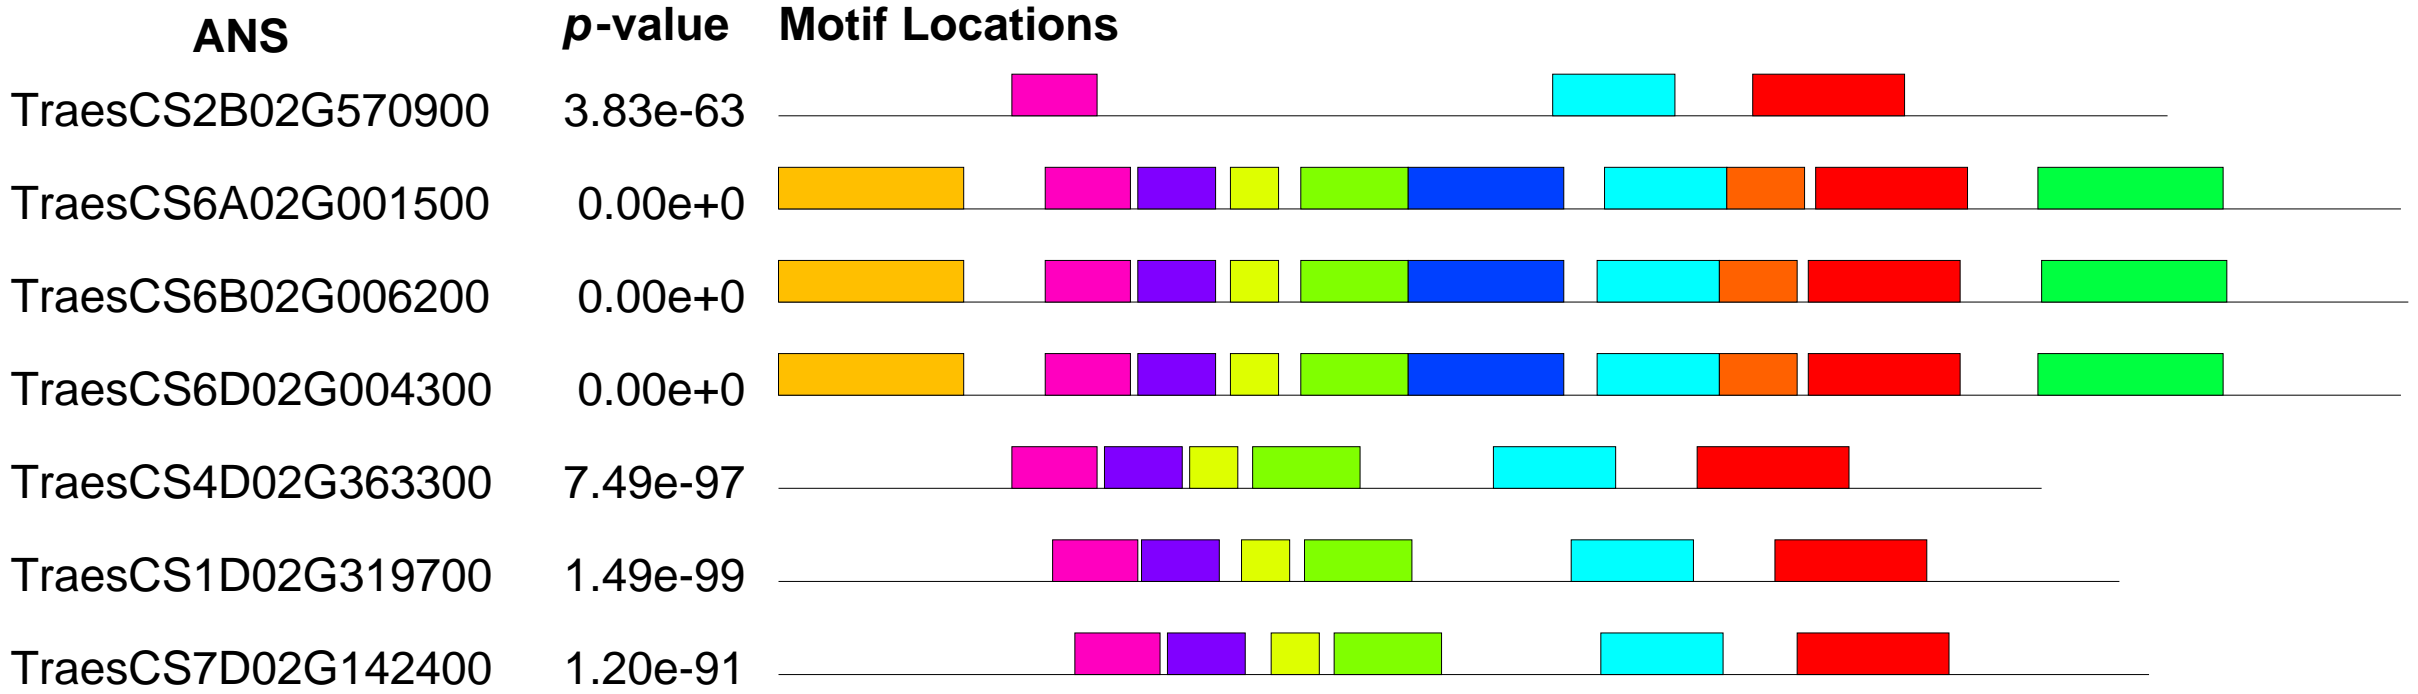

| Motif | Symbol | Motif Consensus                                      |
|-------|--------|------------------------------------------------------|
| 1.    |        | PGTLVVHIGDALEILSNGRYRSVLHRGLVNRQAVRVSVAVF            |
| 2.    |        | LKLKJNYYP RCPQPELAVGVEPHTDVSALTFIL                   |
| 3.    |        | RDWEDYLYLMLHPDARRDHALWPAHPPEY                        |
| 4.    |        | LRAAGTGFFRMPJEDKZAYAN                                |
| 5.    |        | MARVEALSMSGATAIPA EYVRPQEERQGLGDAYDEAAA SWSAAGSPRIPV |
| 6.    |        | ETPRFEPRTFRQH LERKVLKKTNDQQEEEVVKKPPVVAQEEEKEVVKKPP  |
| 7.    |        | VPVTKTTFGEHVSALSSRLLAILSLGLGVPADTLERRLR LRTSG        |
| 8.    |        | VRAAAE EWGVFHVAGHGIPEDLI                             |
| 9.    |        | TNGVPGLQVLLPGDGQ TWVTA                               |
| 10.   |        | GRLEGYGSRLVGS                                        |

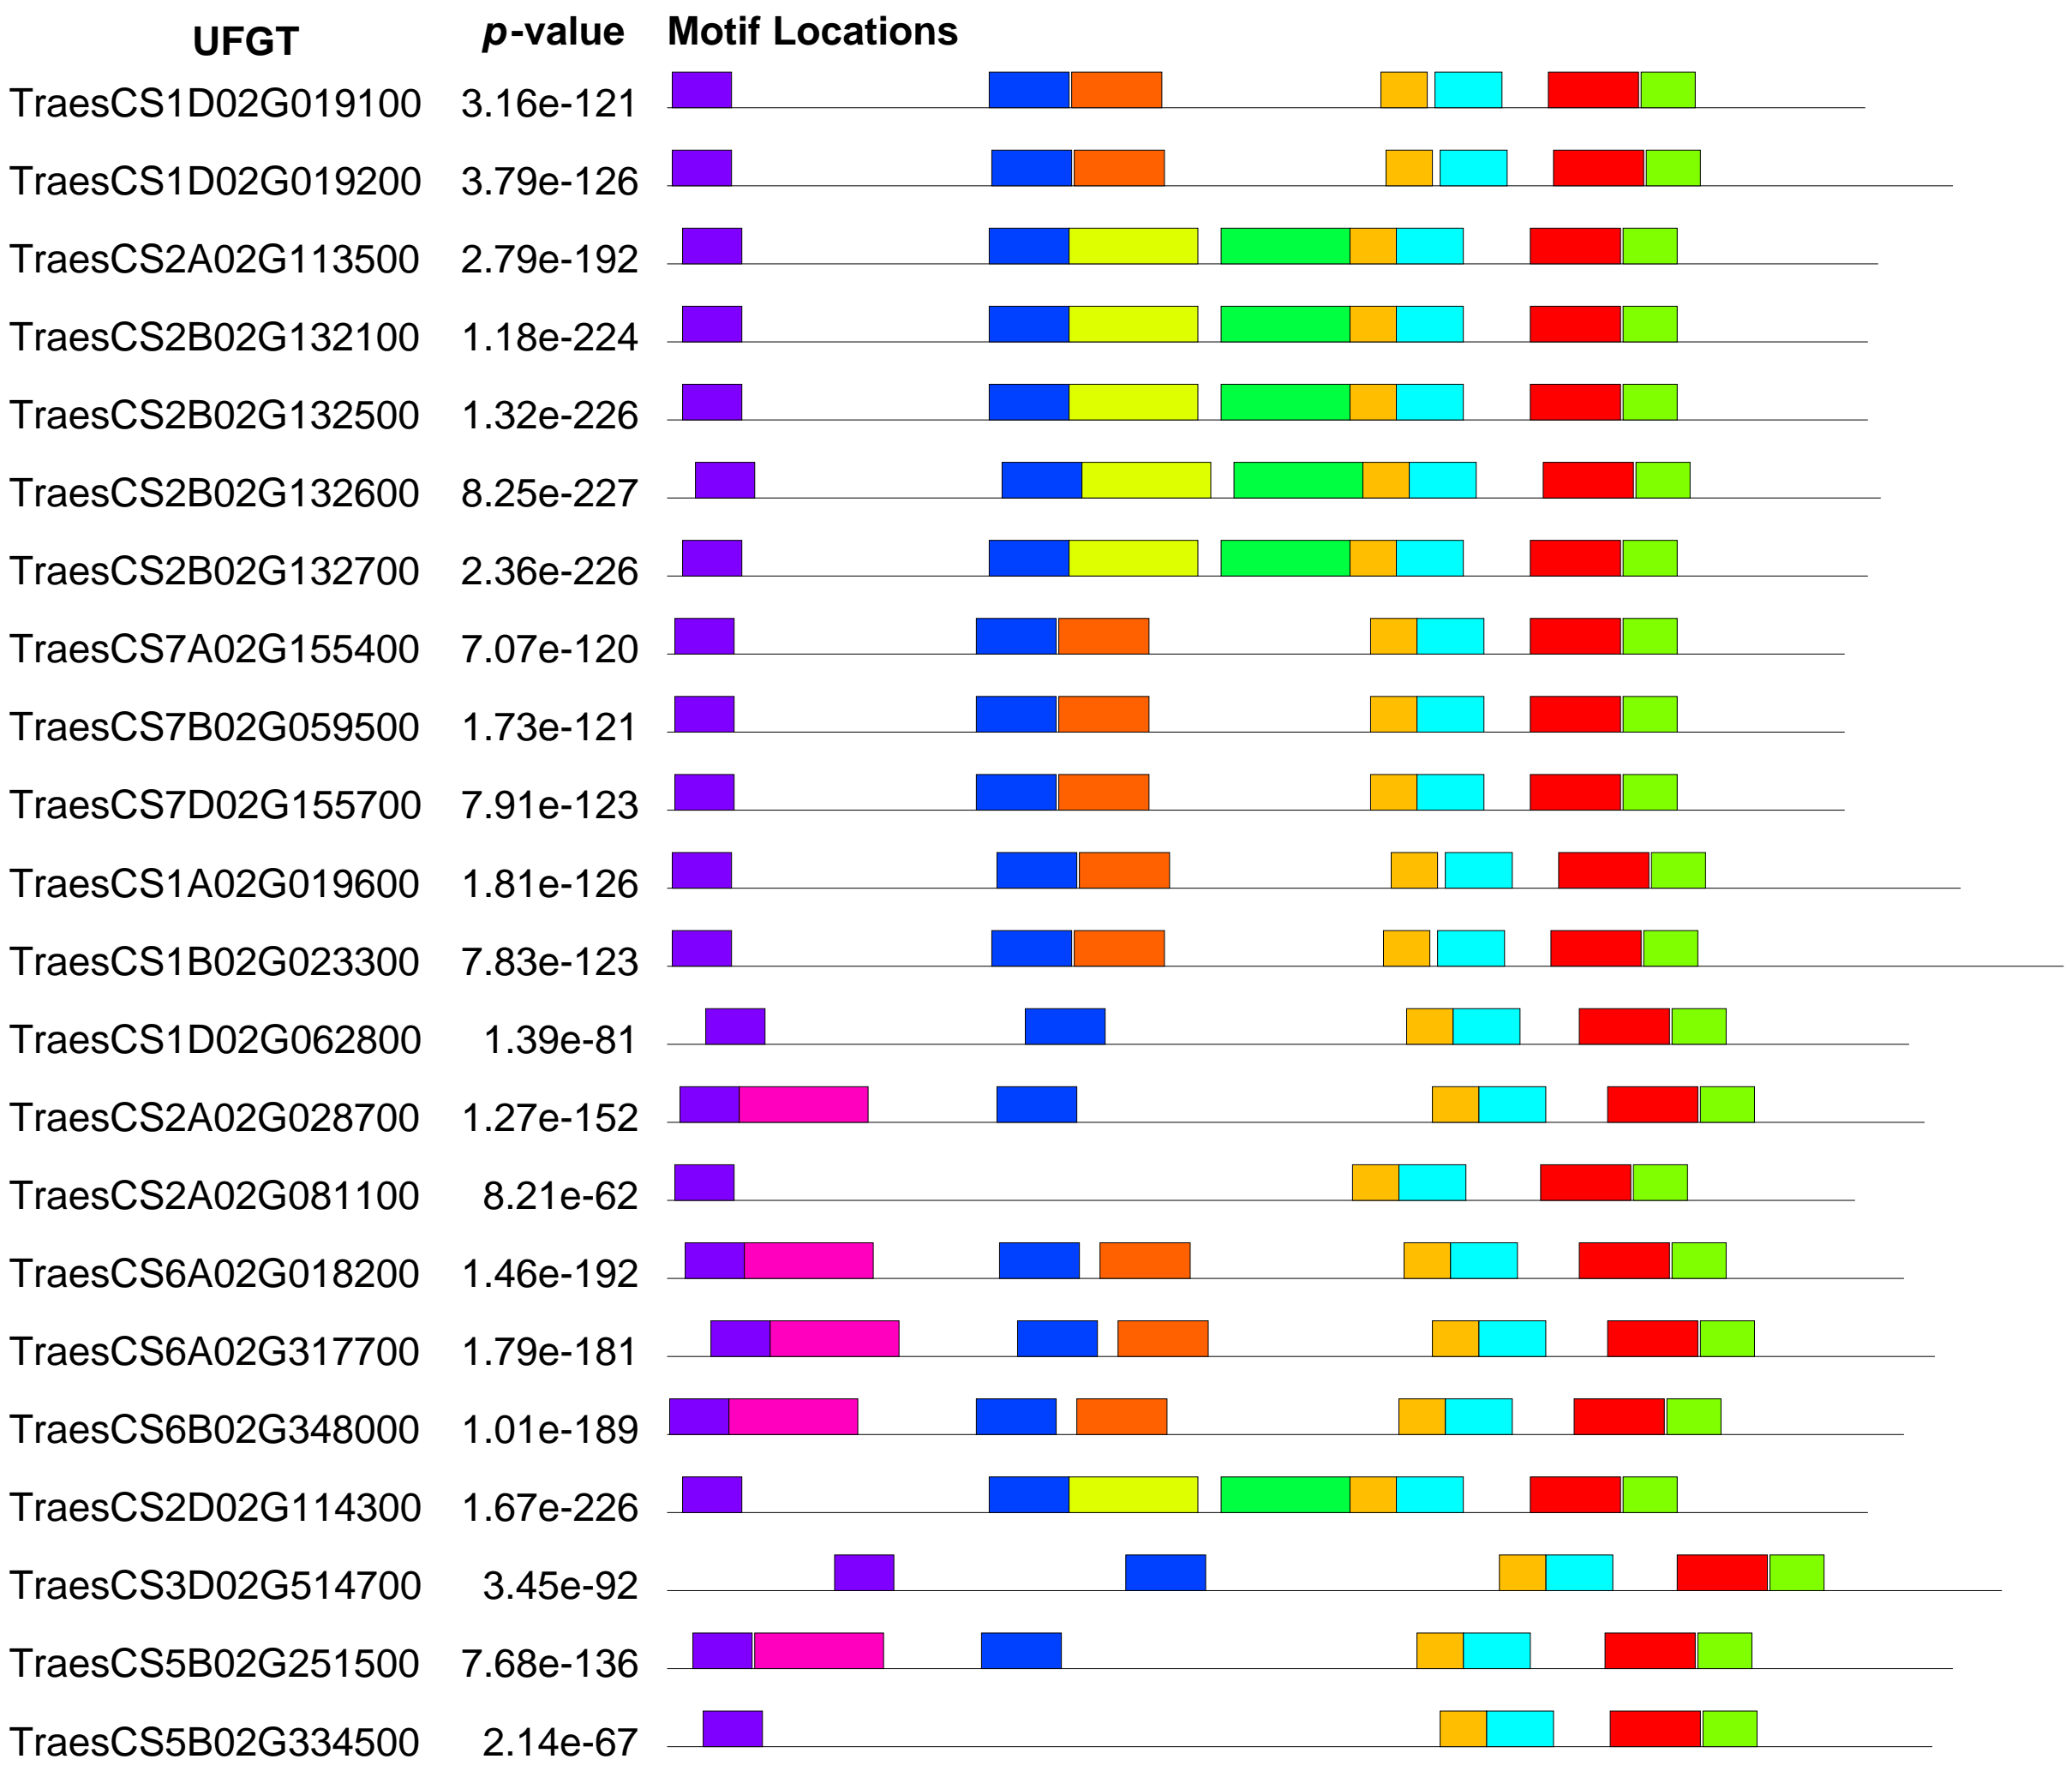

| Motif | Symbol | Motif Consensus                                    |
|-------|--------|----------------------------------------------------|
| 1.    |        | SWAPQERVLRHPAVGAFLTHCGWNSVLESMAAGVP                |
| 2.    |        | SPEZLAELAWGLELSGAPFLWVLRPD                         |
| 3.    |        | VCLPFFADQPTNARLVAAEEWG                             |
| 4.    |        | EKPHVVVFPFPAQGHINPLLELA                            |
| 5.    |        | GKEPGSVVYVSFGSEATM                                 |
| 6.    |        | IKTCADIERKYVDYLSQLVGKEVVPTGPLLVDSGGSEGKRDGGRIMRWLD |
| 7.    |        | MWWAAEAAAARGVPAVHFWTGSACAFLAYLH                    |
| 8.    |        | KVLHARGFHVTFVNTEYNHRLLRSRGPDALAGVPGFRFETIPDGLPPSD  |
| 9.    |        | DALRKDVGDLAASRADELLTSHPGGLGGYRVRDLPD               |
| 10.   |        | CLKNERTPSAFFPFESISLGAEEDAKYAAQLVSRDDGTAQIPERDRLPLS |

**Supplemental Table S1: Analysed motifs of anthocyanin biosynthetic genes**

| CHS    |                 |                                                     |                                                                                                 |
|--------|-----------------|-----------------------------------------------------|-------------------------------------------------------------------------------------------------|
|        | Domain ID       | Motif                                               | Function                                                                                        |
| 1      | Chal_sti_synt_C | WNSVFWIAHPGGPAILDMVEAKVNLNKERMTRATHVLSEYGNMSSACVLF  | Catalyze the formation of (2S)-5-hydroxyflavanone from 6'-hydroxychalcone (naringenin chalcone) |
| 2      | Chal_sti_synt_N | DYQLTKMLGLRPSVKRLMMYQQGCFAGGTVLRRLAKDLAENNRGARVLVVC |                                                                                                 |
| 3      | Chal_sti_synt_N | NCVYQADYPDYYFKITKSDHMADLKEKFKRMCDKSQIRKRYMHLTEEILQ  |                                                                                                 |
| 4      | Chal_sti_synt_C | QLVSASQTILPDSEGAIDGHLREVGLTFHLLKDVPGLISKNIER        |                                                                                                 |
| 5      | Chal_sti_synt_N | PNMCAYMAPSLDARQDIVVVEVPKLGKAAAQKAIKEWGQPRSKITHLVFC  |                                                                                                 |
| 6      | Chal_sti_synt_C | IMDEMRKRSAEDGHATTGEGMDWGVLFGFGPGLTVETVVLH           |                                                                                                 |
| 7      | Chal_sti_synt_N | SEITAVTFRGPHESHLDLVLGQALFGDGAAAVIIGADP              |                                                                                                 |
| 8      | Chal_sti_synt_N | EEVRKAQRAEGPATVLAIGTATPA                            |                                                                                                 |
| F3H    |                 |                                                     |                                                                                                 |
| 1      | 2OG-Fell_Oxy    | PPVSGALVVNIGDHLQLMSNGRFKSVEHRAV-VNGEGPRLSVATFF      | Role in the 3-hydroxylation of flavanone to form dihydroflavonol                                |
| 2      | 2OG-Fell_Oxy    | VAVNYYPACPZPDLTLGLKRHTDPGFJTLLQDA                   |                                                                                                 |
| 3      | DIOX_N          | CETWGFFQVVNHGVPEALIADMLRAVREF                       |                                                                                                 |
| 6      | MbtH            | WPEK---PAGWRVVER                                    |                                                                                                 |
| 9      | BNR             | ATRDGGKTW                                           |                                                                                                 |
| F3'H   |                 |                                                     |                                                                                                 |
| 1      | p450            | PRESQEDCQVQGYDVPAGTRVLVNAWAIGRDPAYWEDAEEF           | Catalyze the hydroxylation step to impart purple-blue pigments                                  |
| 2      | p450            | FKGNDFZFLPFGAGRRMCPGMAFG                            |                                                                                                 |
| 3      | p450            | IKAVJLDVFAAGTDTSATTJEWAMAELMRNPRVMQKAQAEV           |                                                                                                 |
| 5      | p450            | EDDLAKLPYLKAVIKETLRLHPPAPL                          |                                                                                                 |
| 6      | p450            | VPTVVVSSAEAAREVLKTHDHVFASRP                         |                                                                                                 |
| F3'5'H |                 |                                                     |                                                                                                 |
| 1      | p450            | YLQAVIRETLRLHPYGPLJPPREAMEDCTVAGYDVPRGTQVIVNVWALGR  | Catalyze the hydroxylation step to impart purple-blue pigments                                  |
| 2      | p450            | IKAIVLIDILIAGTDTSATTVEWAMAELMNNPEVMRKATAELDAVVG     |                                                                                                 |
| 4      | p450            | FLPFGAGRRGCPGIALGLRFVGLALASLLQGFDW                  |                                                                                                 |
| DFR    |                 |                                                     |                                                                                                 |
| 1      | GDP_Man_Dehyd   | VTGGGGFIGSWJVKLLLDRGYTVHGTVRNPQDEK                  |                                                                                                 |



|      |                |                                           |                                                                  |
|------|----------------|-------------------------------------------|------------------------------------------------------------------|
| 1    | Epimerase      | VCVTGGGGFIGSWJVKLLLD RGYTVHGTVRNPQDEKNA   | NAD dependent<br>epimerase/dehydratase                           |
| 2    | NAD_binding_4  | KTELWYCVSKTLAEKAAWEFAGEEGLELVVNPGLVLG     |                                                                  |
| 3    | NAD_binding_10 | DERLRLFQADLLDPASLRAAIEGCHGVFHLA           |                                                                  |
| 3    | Epimerase      | DERLRLFQADLLDPASLRAAIE--GCHGVFHLAS        |                                                                  |
| 6    | 3Beta_HSD      | GTLNVLRAAKDAGVKRVVMTSSQTAVCPN             |                                                                  |
| ASN  |                |                                           |                                                                  |
| 1    | 2OG-Fell_Oxy   | GTLVVHIGDALEILSNGRYRSVLHRGL-VNRQAVRVSVAVF | Catalyze a remarkably<br>diverse range of<br>oxidative reactions |
| 2    | 2OG-Fell_Oxy   | KJNYYP RCPQPELAVGVEPHTDVSALTFIL           |                                                                  |
| 8    | DIOX_N         | VRAAAEEWGVFHVAGHGIPEDLI                   |                                                                  |
| UFGT |                |                                           |                                                                  |
| 1    | UDPGT          | WAPQERVLRHPAVGAFLTHCGWNSVLESMAAGVP        | UDP-<br>glycosyltransferase                                      |
| 2    | UDPGT          | VCLPFFADQPTNARLVAEEWG                     |                                                                  |
